# Supplementary material
Source: HighWire-hosted journal article supplement (https://ijgc.bmj.com/content/ijgc-2021-002631)
Supplement: inline-supplementary-material-1 [file inline-supplementary-material-1.pdf]

Supplemental Table 1. Specific material needed to perform a uterine manual vacuum aspiration for treatment of hydatidiform mole.

| Material                                                              | Function                                                                                                       |
|-----------------------------------------------------------------------|----------------------------------------------------------------------------------------------------------------|
| Gauze and surgical dressing                                           | Used for both antisepsis and cervical hemostasis                                                               |
| Cheron dressing forceps (1 unit)                                      | Used for external and internal genital antisepsis                                                              |
| Surgical bowl (1 unit)                                                | Used to store chlorhexidine for antisepsis                                                                     |
| Kidney dish (2 unit)                                                  | Used to receive material aspirated from the uterus by the syringe                                              |
| Vaginal speculum (1 unit)                                             | Used to visualize access to the uterus via the cervical canal                                                  |
| Pozzi uterine tenaculum forceps (1 unit)                              | Used to provide traction of the cervix, rectifying the uterus and minimizing the chance of uterine perforation |
| Intrauterine suction cannula (1 unit for each number from 4 until 12) | Used both for cervical dilation and for accessing intrauterine content                                         |
| Syringe (2 units)                                                     | Used to promote negative pressure and aspirate intrauterine content and store it during the procedure          |
| Sharp uterine curette (1 unit)                                        | Used to gently curette the endometrial cavity at the end of the manual vacuum aspiration                       |
